# Supplementary material for: XRD and cytotoxicity assay of submitted nanomaterial industrial samples in the Philippines
Source: publisher site journal article supplement (doi:10.1515/psr-2022-0255), 2023-03-02
Supplement: Supplementary file 1 [file j_psr-2022-0255_suppl_001.pdf]

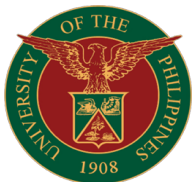

**Institute of Chemistry**  
College of Science  
**University of the Philippines**  
Diliman, Quezon City 1101

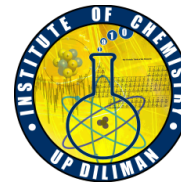

---

Rm. 101, Teaching Building, Institute of Chemistry, National Science Complex,  
TeleFax No. 9205427, UP trunkline: 9818500 local 3652

---

**Ponnadurai Ramasami, Ph. D.**

Professor/Editor of Sustainable  
Chemistry Research  
Department of Chemistry  
University of Mauritius  
Mauritius  
October 31, 2022

CC: Editorial Board  
Physical Sciences Reviews  
De Gruyter

Dear Prof. Ramasami,

Greetings! I am submitting our article entitled "Industrial Nanomaterial Characterization Using XRD and MTT Cytotoxicity Assay" for review, and possible inclusion as book chapter in the book project entitled "Sustainable Chemistry Research: Resilience through Basic Science and Interdisciplinary Science".

This write-up is a result of one of the projects under the Nanosafety Program of the Philippine Department of Science and Technology and the Philippine Department of Trade and Industry. As there is no existing policy in the Philippines on nanosafety and nanomaterial production and standards, a committee called Bureau of Philippine Standards Technical Committee 85 (BPS-TC 85) was created comprising the academia, government, and industry to review ISO standards for possible adoption to local standards, and to perform needed experiments to assess nanomaterial purity, metrology, and safety. These groups are pooling together resources, where each institute contributes available capabilities such as equipment and materials.

Thank you very much for reviewing our work. We are looking forward to the possible publication of our results.

Sincerely,

A handwritten signature in blue ink, appearing to read "Imee Su Martinez".

Imee Su Martinez, Ph. D.  
Professor  
Institute of Chemistry  
University of the Philippines-Diliman  
Quezon City, Philippines 2100
